# Supplementary material for: Zoonotic Giardia duodenalis Genotypes and Other Gastrointestinal Parasites in a Badger Population Living in an Anthropized Area of Central Italy
Source: MDPI journal article supplement (doi:10.3390/pathogens11080906), 2022-08-11
Supplement: s1 [file s1]

**Supplementary File S1 : Raw FASTA sequences (n=11) obtained from 10 badger stool samples (ID=Mm.n) at the  $\beta$ -giardin (bg; number of sequences=8) and the triose phosphate isomerase (tpi; number of sequences=3) loci**

**>Mm.3\_bg** (identified as Assemblage A, sub assemblage All)

TCCATAACGACGCCATCGCGGCTCTCAGGAAGGAGGCCCTCAAGAGCyTGAACGAyCTCGAGACGGGCATTGCCACG  
GAGAACGCAGAAAGGAAGAAGATGTACGACCAGCTCAACGAGAAGGTCGAGAGGGCTTCGCCCCGATCTCCGCCG  
CGATCGAGAAGGAGACGATCGCCCGGAGAGGGCCGTTAGTGCTGCCACGACAGAAGCGCTCACAAACACGAAGCT  
CGTCGAGAAGTGCGTCAACGAGCAGCTCGAGAACGTGCGCTCGGAGATCCGCGCTATCCAGGAGGAGATCGACCGC  
GAGAAGCCCGAGCGCAAGGA

**>Mm.5\_bg** (identified as mixed Assemblage A and B infection)

CATAACGACGCCATCGCGGCTCTCAGGAAGGAGGCCCTCAAGAGCyTGAACGACCTCGAGACRGGCATyGCCACGGA  
GAACGCMGARAGGAAGAAGATGTAYGACCAGCTCAACGAGAARGTCGAGAGGGCTTCGCCCCGATCTCCGCCGS  
ATCGAGAAGGAGACGATCGCCCGGAGAGGGCCGTYAGYGCTGCCACGACAGARGCSCTCACAAACACGAAGCTCGT  
CGAGAAGTGCGTCAACGAGCAGCTCGAGAACGTGCGCTCGGAGATCCGCGCYATCCAGGAGGAGATCGACCGCGAG  
AAGGCCGAGCGCAAGGA

**>Mm.11\_bg** (identified as Assemblage A, sub assemblage All)

TccATAACGACGCCATCGCGGCTCTCAGGAAGGAGGCCCTCAAGAGCyTGAACGAyCTCGAGACGGGCATTGCCACG  
GAGAACGCAGAAAGGAAGAAGATGTACGACCAGCTCAACGAGAAGGTCGAGAGGGCTTCGCCCCGATCTCCGCCG  
CGATCGAGAAGGAGACGATCGCCCGGAGAGGGCCGTTAGTGCTGCCACGACAGAAGCGCTCACAAACACGAAGCT  
CGTCGAGAAGTGCGTCAACGAGCAGCTCGAGAACGTGCGCTCGGAGATCCGCGCTATCCAGGAGGAGATCGACCGC  
GAGAAGGCCGAGCGCAaGGA

**>Mm.14\_bg** (identified as Assemblage A, sub assemblage All)

tcCATAACGACGCCATCGCGGCTCTCAGGAAGGAGGCCCTCAAGAGCyTGAACGAyCTCGAGACGGGCATTGCCACG  
GAGAACGCAGAAAGGAAGAAGATGTACGACCAGCTCAACGAGAAGGTCGAGAGGGCTTCGCCCCGATCTCCGCCG  
CGATCGAGAAGGAGACGATCGCCCGGAGAGGGCCGTTAGTGCTGCCACGACAGAAGCGCTCACAAACACGAAGCT  
CGTCGAGAAGTGCGTCAACGAGCAGCTCGAGAACGTGCGCTCGGAGATCCGCGCTATCCAGGAGGAGATCGACCGC  
GAGAAGGCCGAGCGCAAGGA

**>Mm.16\_bg** (identified as Assemblage A, sub assemblage All)

TCCATAACGACGCCATCGCGGCTCTCAGGAAGGAGGCCCTCAAGAGCCTGAACGAyCTCGAGACGGGCATTGCCACG  
GAGAACGCAGAAAGGAAGAAGATGTACGACCAGCTCAACGAGAAGGTCGAGAGGGCTTCGCCCCGATCTCCGCCG  
CGATCGAGAAGGAGACGATCGCCCGGAGAGGGCCGTTAGTGCTGCCACGACAGAAGCGCTCACAAACACGAAGCT  
CGTCGAGAAGTGCGTCAACGAGCAGCTCGAGAACGTGCGCTCGGAGATCCGCGCTATCCAGGAGGAGATCGACCGC  
GAGAAGGCCGAGCGCAaGGA

**>Mm.22\_bg** (identified as Assemblage A, sub assemblage All)

TcCATAACGACGCCATCGCGGCTCTCAGGAAGGAGGCCCTCAAGAGCCTGAACGAyCTCGAGACGGGCATTGCCACG  
GAGAACGCAGAAAGGAAGAAGATGTACGACCAGCTCAACGAGAAGGTCGAGAGGGCTTCGCCCCGATCTCCGCCG  
CGATCGAGAAGGAGACGATCGCCCGGAGAGGGCCGTTAGTGCTGCCACGACAGAAGCGCTCACAAACACGAAGCT  
CGTCGAGAAGTGCGTCAACGAGCAGCTCGAGAACGTGCGCTCGGAGATCCGCGCTATCCAGGAGGAGATCGACCGC  
GAGAAGGCCGAGCGCAAGGACGCAGACG

**>Mm.23\_bg** (identified as Assemblage A, sub assemblage All)

TcCATAACGACGCCATCGCGGCTCTCAGGAAGGAGGCCCTCAAGAGCCTGAACGAyCTCGAGACGGGCATTGCCACG  
GAGAACGCAGAAAGGAAGAAGATGTACGACCAGCTCAACGAGAAGGTCGCAGAGGGCTTCGCCCCGCATCTCCGCCG  
CGATCGAGAAGGAGACGATCGCCCGCAGAGGGCCGTTAGTGCTGCCACGACAGAAGCGCTCACAAACACGAAGCT  
CGTCGAGAAGTGCGTCAACGAGCAGCTCGAGAACGTCGCCTCGGAGATCCGCGCTATCCAGGAGGAGATCGACCGC  
GAGAAGGCCGAGCGCAAGGAC

>**Mm.25\_bg** (identified as Assemblage A, sub assemblage All)

CATAACGACGCCATCGCGGCTCTCAGGAAGGAGGCCCTCAAGAGCyTGAACGAyCTCGAGACGGGCATTGCCACGGA  
GAACGCAGAAAGGAAGAAGATGTACGACCAGCTCAACGAGAAGGTCGCAGAGGGCTTCGCCCCGCATCTCCGCCGCG  
ATCGAGAAGGAGACGATCGCCCGCAGAGGGCCGTTAGTGCTGCCACGACAGAAGCGCTCACAAACACGAAGCTCG  
TCGAGAAGTGCGTCAACGAGCAGCTCGAGAACGTCGCCTCGGAGATCCGCGCTATCCAGGAGGAGATCGACCGCGA  
GAAGGCCGAGCGCAAGGA

>**Mm.20\_tpi** (identified as Assemblage A, sub assemblage All)

GGCAAACACGTCAAAACAGTTGAGGATAGCAGCGCAGAATGTGTACCTAGAGGGGAACGGGGCGTGGAATGGCGA  
GACAAGTGTGAGATGCTTCAGGACATGGGTTTGAAGCATGTGATAGTAGGGCACTCTGAAAGACGCAGAATCATGG  
GGGAGACCGACGAGCAAAGCGCCAAGAAGGCTAAGCGTGCCCTGGAAAAGGGGATGACGGTCATCTTCTGCGTCGG  
AGAGACCTTGATGAGCGCAAGGCCAACCGCACCATGGAGGTGAACATCGCCCAGCTTGAGGCGCTTGGAAGGAG  
CTCGGAGAGTCCAAGATGCTCTGGAAGGAGGTTGTCATTG

>**Mm.15a\_tpi** (identified as Assemblage A, sub assemblage All)

GtCCCTTCATCGGGGGTAACtCAAGTGTAACGGCTCTCTTGACTTTATCAAGAGCCACGTGGCGGCAATTGCTGCCCA  
TAAGATCCCTGATTCCGTGGACGTCGCCATTGCCCCCTCCGCCGTACACCTGTCAACAGCCACTGCGGCAAACACGTCA  
AAACAGTTGAGGATAGCAGCGCAGAATGTGTACCTAGAGGGGAACGGGGCGTGGAATGGCGAGACAAGTGTTGAG  
ATGCTTCAGGACATGGGTTTGAAGCATGTGATAGTAGGGCACTCTGAAAGACGCAGAATCATGGGGGAGACCGACG  
AGCAAAGCGCCAAGAAGGCTAAGCGTGCCCTGGAAAAGGGGATGACGGTCATCTTCTGCGTCGGAGAGACCTTGGA  
TGAGCGCAAGGCCAACCGCACCATGGAGGTGAACATCGCCCAGCTTGAGGCGCTTGGAAGGAGCTCGGAGAGTCC  
AAGATGCTCTGGAAGGAGGTTGTCATT

>**Mm.16\_tpi** (identified as mixed Assemblage A and B infection)

tccgtggacgtGTyGTTGCTCCCTCCGTTGTACACCTTTCTACAGCYATTGCGGCRAACAcTTCGAARyGTcTGArrAtaGCA  
GCRCAAGAyGTGTAYcTGGAGggGAACGGkGCATGgaCyGGCGAGACAAGCGTyGAGAtGCTkCtGGACATGGGkyTGA  
rsCATGTAATArTAGGaCACTcTGAAAGACGyAGAATCATGGGsGAGACCAAyGAGCArAgTGCyAaGAAGGckAAGCGt  
GCyCTGGAmAArGgkAtGACKGTyaTCTTyTGCrycGGAGAGACCCTGgATgaACGCAagGCCCAyaACaCTAtGgAGgTG  
AAmATtgCTCAGCTTGAGgCTcTTAaCAAGGaGaTTGGAGAAtCmAAGAAgCTmtgGAAGAAGGTTgTAATTg
